# Supplementary material for: Evaluation of Potential Mechanisms Controlling the Catalase Expression in Breast Cancer Cells
Source: Hindawi journal article supplement (doi:10.1155/2018/5351967), 2018-01-01
Supplement: f1 [file 5351967.f1.pdf]

**Table S1.** Oligonucleotides (qRT-PCR).

| <b>Gene</b>            | <b>Forward primer</b> | <b>Reverse primer</b> |
|------------------------|-----------------------|-----------------------|
| <i>Catalase</i>        | ccagaagaaagcggtaagaa  | gagatccggactgcacaaag  |
| <i>EF1 (reference)</i> | cttcactgctcaggtgat    | gccgtgtggcaatccaat    |
| <i>c-ABL</i>           | aaaaccttctcgctggaccc  | ttgggcttcacaccattcc   |
| <i>ATM</i>             | ccgactttgtccctctggctt | cctaggcctcccatcatctt  |
| <i>ATR</i>             | tgaagacttggttacctcc   | tgcatactcatcaactgcaaa |
| <i>Chk1</i>            | ctcaagaaaggggcaaaaag  | ggttctggctgagaactgga  |
| <i>Chk2</i>            | ggagggacaaaagctgtgaa  | tcctgaaaatccgaaagtg   |
